# Supplementary material
Source: MDPI journal article supplement (https://www.mdpi.com/2073-4395/11/7/1323)
Supplement: s1 [file s1]

Supplementary Material:

**Table S1.** Temperature and precipitation change in Southeastern USA by the end of the 21st century [55]

| Timeline                                               | Temperature Change | Precipitation Change | Remarks                                                               |
|--------------------------------------------------------|--------------------|----------------------|-----------------------------------------------------------------------|
| <b>By 2099</b><br>(started as early 1895, 1930, 1960s) | -2°C to 6°C        | -30% to +35%         | Meta-analysis                                                         |
| <b>By 2099</b><br>(historical base: 1950-2005)         | 2.5°C              | No change (0%)       | From GCM analysis (median: 50 <sup>th</sup> percentiles)              |
| <b>By 2099</b><br>(historical base: 1950-2005)         | -2°C to 6°C        | -75% to 110%         | From GCM analysis (5 <sup>th</sup> and 95 <sup>th</sup> percentiles)  |
| <b>By 2099</b><br>(historical base: 1950-2005)         | -3°C to 4°C        | -40% to +40%         | From GCM analysis (25 <sup>th</sup> and 75 <sup>th</sup> percentiles) |

**Table S2.** Temperature and precipitation change in Florida & Southeastern USA by the end of the 21st century [54]

| Timeline                                                                             | Temperature Change                 | Precipitation Change                | Remarks                                                             |
|--------------------------------------------------------------------------------------|------------------------------------|-------------------------------------|---------------------------------------------------------------------|
| <b>By 2099</b><br>(started as early as 1860 (temperature.) and 1895 (precipitation)) | -3°C to 6°C<br>(9 scenarios: +1°C) | -40% to +30%<br>(7 scenarios: +10%) | Meta-analysis<br>(32 studies)                                       |
| <b>By 2099</b><br>(base: slightly before 2000)                                       | 1°C to 6°C (FL)                    | -12.5% to +20%<br>(FL:1970-2050)    | Scenario plots<br>(spatial scenario plot)                           |
| <b>By 2099</b><br>(base: slightly before 2000)                                       | 1°C to 6°C (FL)                    | -20% to +30% (FL)                   | Scenario plots<br>(temporal scenario plot:<br>annual/diurnal/daily) |

**Table S3.** Global temperature and CO<sub>2</sub> changes under Representative Concentration Pathways (RCPs) by the end of the 21st century [11,56]

| RCP Scenarios    | Mean CO <sub>2</sub> Concentration<br>(projected for 2100) | Temperature<br>Changing range | Mean Change in<br>temperature<br>(2081-2100),<br>base: 1986-2005 | Scenario<br>Generation |
|------------------|------------------------------------------------------------|-------------------------------|------------------------------------------------------------------|------------------------|
| RCP 2.6/ECP 3PD  | 421                                                        | 0.3-1.7                       | 1.0                                                              |                        |
| RCP 4.5/ECP 4.5  | 538                                                        | 1.1-2.6                       | 1.8                                                              | 1.5, 3                 |
| RCP 6/ ECP 6     | 670                                                        | 1.4-3.1                       | 2.2                                                              |                        |
| RCP 8.5/ ECP 8.5 | 936                                                        | 2.6-4.8                       | 3.7                                                              | 3, 4.5, 6              |

Note: (RCP 2.6 and RCP 6) were omitted from the scenario generation step in this study, as the associated CO<sub>2</sub> concentrations were in between the considered three levels. Which would have increased the numbers of scenarios without providing variations from the considered scenarios

**Table S4.** Sources of scenarios regarding nutrient management (fertilizer, manure), residue incorporation, and reduced tillage

| Management Scenarios                      | Definition                                                                                               | References    |
|-------------------------------------------|----------------------------------------------------------------------------------------------------------|---------------|
| <b>Baseline</b>                           | Conventional Tillage+15% residue+ Conventional dose of Mineral Fertilizer                                | [63]          |
| <b>Manure Incorporation</b>               | Addition of 2000 kgC/ha and 1000 kgC/ha farmyard manure with the conventional system                     | [36,37,63]    |
| <b>80% Residue incorporation</b>          | Incorporation of 80% above ground residue (Normal incorporation is approx. 15%)                          | [36]          |
| <b>50% fertilizer+ 1000 kgC/ha manure</b> | Replacement of 50% of Conventional fertilizer with 1000 kg C/ha Manure                                   | [63]          |
| <b>No-till</b>                            | Conversion to No-till (Mulching) with different above-ground residue incorporation rates (15% and above) | [35, 62, 64 ] |

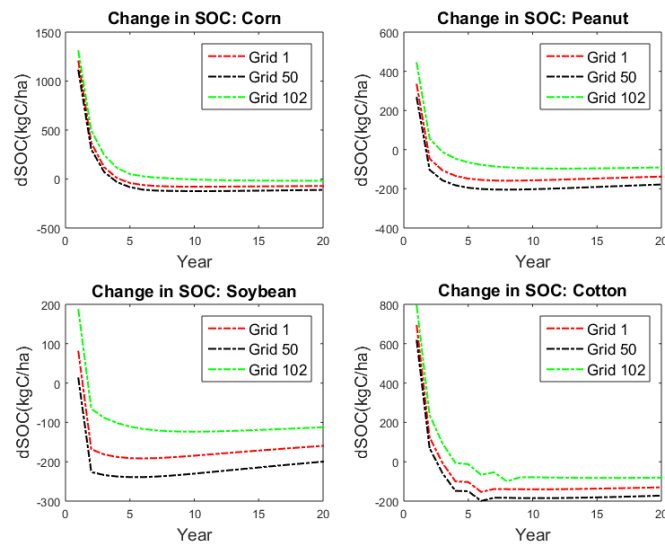

**Figure S1.** Impact of the 20 years spin-up time in establishing SOC equilibrium on three example grids from the regional runs

**Table S5.** The median changes of grain yields, N<sub>2</sub>O, CO<sub>2</sub> and GWPs rates for four major crops of the Choctawhatchee Basin

| Grain Yield      |      |         |        |        | N <sub>2</sub> O |       |         |        |        |
|------------------|------|---------|--------|--------|------------------|-------|---------|--------|--------|
| Scenarios        | Corn | Soybean | Cotton | Peanut | Scenarios        | Corn  | Soybean | Cotton | Peanut |
| Unit (% change)  | %    | %       | %      | %      | Unit (% change)  | %     | %       | %      | %      |
| 80% residue      | 3.4  | 0.2     | 16.7   | 0.0    | 80% residue      | 20.9  | 42.1    | 17.1   | 40.9   |
| 500 kgC/ha Man.  | 5.8  | 0.1     | 39.1   | 0.0    | 500 kgC/ha Man.  | 16.5  | 52.6    | 20.0   | 54.5   |
| 1000 kgC/ha Man. | 10.5 | 0.2     | 59.5   | 0.0    | 1000 kgC/ha Man. | 30.4  | 105.3   | 41.4   | 213.6  |
| 2000 kgC/ha Man. | 16.3 | 0.2     | 78.8   | 0.0    | 2000 kgC/ha Man. | 61.4  | 231.6   | 92.9   | 213.6  |
| 50% fert.+ Man.  | -4.8 | 0.2     | 38.4   | 0.0    | 50% fert.+ Man.  | -20.9 | 105.3   | -7.1   | 100.0  |
| No-till-15% res. | 7.2  | -1.4    | 33.9   | 0.0    | No-till-15% res. | 25.3  | -5.3    | 7.1    | 18.2   |
| No-till-50% res. | 6.9  | 1.1     | 36.5   | 0.0    | No-till-50% res. | 53.2  | 42.1    | 37.1   | 59.1   |

  

| CO <sub>2</sub>  |                           |                           |                           |                           | GWP              |                           |                           |                           |                           |
|------------------|---------------------------|---------------------------|---------------------------|---------------------------|------------------|---------------------------|---------------------------|---------------------------|---------------------------|
| Scenarios        | Corn                      | Soybean                   | Cotton                    | Peanut                    | Scenarios        | Corn                      | Soybean                   | Cotton                    | Peanut                    |
| Unit (NB)        | kg CO <sub>2</sub> eq./ha | kg CO <sub>2</sub> eq./ha | kg CO <sub>2</sub> eq./ha | CO <sub>2</sub> kg eq./ha | Unit (NB)        | kg CO <sub>2</sub> eq./ha |
| 80% residue      | 897                       | 398                       | 416                       | 378                       | 80% residue      | 765                       | 362                       | 368                       | 340                       |
| 500 kgC/ha Man.  | 265                       | 285                       | 293                       | 279                       | 500 kgC/ha Man.  | 151                       | 238                       | 228                       | 222                       |
| 1000 kgC/ha Man. | 522                       | 554                       | 566                       | 545                       | 1000 kgC/ha Man. | 313                       | 463                       | 440                       | 449                       |
| 2000 kgC/ha Man. | 1001                      | 1067                      | 1092                      | 1054                      | 2000 kgC/ha Man. | 575                       | 880                       | 812                       | 855                       |
| 50% fert.+ Man.  | 519                       | 554                       | 561                       | 545                       | 50% fert.+ Man.  | 689                       | 463                       | 595                       | 449                       |
| No-till-15% res. | 10                        | 126                       | 51                        | 133                       | No-till-15% res. | -170                      | 131                       | 28                        | 115                       |
| No-till-50% res. | 315                       | 255                       | 205                       | 257                       | No-till-50% res. | -64                       | 217                       | 88                        | 199                       |
